# Supplementary material for: Influence of dog-appeasing pheromone on canine maternal behaviour during the peripartum and neonatal periods
Source: PubMed Central journal article supplement — Vet Rec. 2019 Dec 26;186(14):449. doi: 10.1136/vr.105603 (PMC7279134; doi:10.1136/vr.105603), 2019-12-26
Supplement: vetrec-2019-105603supp001.pdf [file vetrec-2019-105603supp001.pdf]

**Questionnaire d'inclusion dans l'étude- Comportement maternel de la chienne**

Nom de l'éleveur : .....

Adresse : .....

**Critères d'inclusion**L'éleveur

- L'éleveur élève plus de 10 chiennes reproductrices ☐ Oui ☐ Non
- L'éleveur a été informé des modalités pratiques de l'étude et a signé le formulaire de consentement ☐ Oui ☐ Non
- Les chiennes sont placées dans une zone de maternité dédiée ☐ Oui ☐ Non
- Les chiennes restent dans la zone de maternité, de quelques jours avant la mise-bas prévue jusqu'à au moins 3 semaines après la naissance des chiots ☐ Oui ☐ Non
- Le taux de mortalité, dans les 15 jours postpartum, est inférieur à 15% dans cet élevage (selon les données de l'éleveur) ☐ Oui ☐ Non

Les chiennes

- Gestante (gestation confirmée- > 45J) ☐ Oui ☐ Non
- Race mésocephale ou dolichocéphale ☐ Oui ☐ Non

➔ Toute réponse négative à une seule de ces questions empêchera l'inclusion de la chienne dans l'étude

**Critères de non inclusion**L'éleveur

- Elevage familial ☐ Oui ☐ Non
- Fort attachement entre les chiennes et l'éleveur, contact fréquent ☐ Oui ☐ Non
- Utilisation d'ADAPTIL sur les chiennes à inclure, dans les 4 semaines qui ont précédé l'étude  
☐ Oui ☐ Non
- Utilisation concomitante du diffuseur ADAPTIL, même dans une autre zone de l'élevage que la zone de maternité ☐ Oui ☐ Non

### Les chiennes

- Race prédisposée aux dystocies ☐ Oui ☐ Non
- Race brachycéphale ☐ Oui ☐ Non
- Chienne présentant une pathologie et/ou malformation de l'appareil reproducteur, telle qu'une hyperplasie vaginale, une masse vaginale, une sténose vestibulovaginale, etc, compliquant la mise-bas. ☐ Oui ☐ Non
- Chienne présentant un problème comportemental tel qu'une anxiété de séparation, de l'agressivité envers les gens, de l'anxiété, un trouble de l'attachement, etc.  
☐ Oui ☐ Non
- Chienne qui ne se laissera pas facilement manipuler durant les procédures requises pour l'étude ☐ Oui ☐ Non
- Chienne en cours de traitement avec un produit susceptible de modifier son comportement  
☐ Oui ☐ Non
- Chienne ayant été exposée à ADAPTIL depuis le début de la gestation ☐ Oui ☐ Non

→ Toute réponse positive à une seule de ces questions empêchera l'inclusion de la chienne dans l'étude

### **Exclusion post-inclusion**

- Césarienne
- Modification de lieu de vie de la chienne et de ses chiots après la naissance
- Problème de santé de la chienne impactant son comportement maternel
- Réaction indésirable au produit testé
- Initiation d'un traitement concomitant impactant le comportement de la chienne
- Décision de sortie de l'étude de la part de l'éleveur

**Sur la base des informations renseignées ci-dessus, cette chienne peut être incluse dans l'étude**

☐ **Oui** ☐ **Non**

**NUMERO D'INCLUSION DANS L'ETUDE**
