# Supplementary material for: Influence of dog-appeasing pheromone on canine maternal behaviour during the peripartum and neonatal periods
Source: PubMed Central journal article supplement — Vet Rec. 2019 Dec 26;186(14):449. doi: 10.1136/vr.105603 (PMC7279134; doi:10.1136/vr.105603), 2019-12-26
Supplement: vetrec-2019-105603supp002.pdf [file vetrec-2019-105603supp002.pdf]

Échelle visuelle analogique (EVA) - Comportement maternel de la chienne

Nom de l'élevage : -  
Nom de la chienne :  
N° dans l'étude :                      V\_\_    Date :

Veuillez marquer sur chaque ligne un point qui, selon vous, représente au mieux votre perception de l'état actuel des situations suivantes :

La chienne vous semble-t-elle stressée aujourd'hui ?

|                                                                                                               |  |                                                                                      |
|---------------------------------------------------------------------------------------------------------------|--|--------------------------------------------------------------------------------------|
| Très stressée : elle est agitée, ne tient pas en place, gémit beaucoup, refuse le contact, déplace ses chiots |  | Pas du tout, elle est calme, silencieuse, recherche les interactions avec ses chiots |
|---------------------------------------------------------------------------------------------------------------|--|--------------------------------------------------------------------------------------|

La chienne semble-t-elle attentionnée envers ses chiots ?

|                                                                          |  |                                                                                 |
|--------------------------------------------------------------------------|--|---------------------------------------------------------------------------------|
| Pas du tout, elle ne les laisse pas approcher ni téter, ne les lèche pas |  | Beaucoup, elle les nourrit fréquemment, les lèche souvent, ne quitte pas le nid |
|--------------------------------------------------------------------------|--|---------------------------------------------------------------------------------|

La chienne reste-t-elle la plupart du temps auprès de ses chiots aujourd'hui ?

|                                        |  |                                                    |
|----------------------------------------|--|----------------------------------------------------|
| Très peu, elle les évite tout le temps |  | Beaucoup, elle les quitte le moins possible/jamais |
|----------------------------------------|--|----------------------------------------------------|

Comment décririez-vous l'appétit de la chienne aujourd'hui ?

|                                |  |        |
|--------------------------------|--|--------|
| Capricieux, très peu d'appétit |  | Vorace |
|--------------------------------|--|--------|

Concernant les chiots :

Est-ce que les chiots semblent en forme aujourd'hui ?

|                                              |                                              |
|----------------------------------------------|----------------------------------------------|
| Pas du tout, ils tètent peu, semblent agités | Très en forme, ils boivent bien, se reposent |
|----------------------------------------------|----------------------------------------------|

Est-ce que les chiots semblent inconfortables aujourd'hui, par exemple au travers de gémissements ?

|                             |                         |
|-----------------------------|-------------------------|
| Ils n'arrêtent pas de gémir | Ils ne gémissent jamais |
|-----------------------------|-------------------------|

Relation mère-chiots

Quel est votre perception par rapport à la relation globale de votre chienne à ses chiots ?

|                                                              |                                                          |
|--------------------------------------------------------------|----------------------------------------------------------|
| Très difficile, elle ne sait pas s'y prendre avec ses chiots | Harmonieuse, sereine, elle se comporte en « bonne mère » |
|--------------------------------------------------------------|----------------------------------------------------------|
